# Supplementary material
Source: PubMed Central journal article supplement (PMC5357804)
Supplement: jz7b00136_si_001.pdf [file jz7b00136_si_001.pdf]

# Supporting Information

For

## Electrochemical Stripping of Atomic Oxygen on Single Crystalline Platinum: Bridging Gas-Phase and Electrochemical Oxidation

*Yi-Fan Huang and Marc T. M. Koper\**

Leiden Institute of Chemistry, Leiden University, Einsteinweg 55, PO Box 9502, 2300 RA  
Leiden, the Netherlands.

### **Temperature of Pt crystal in contacting with O<sub>2</sub>**

Investigations of thermal dissociation of O<sub>2</sub> on Pt(111) by UHV shows that the coverage of O generated at 420 K and 620 K are different.<sup>1</sup> Therefore, the temperature of Pt crystal should be monitored prior to contact with O<sub>2</sub>. Figure S1a shows the temperature of a flame-annealed semi-

bead Pt(111) crystal as a function of time in the round bottom flask under an Ar flow. It can be seen that the temperature of the crystal is  $1026 \pm 6$  K (higher than the temperature of  $O_2$  desorption of  $\sim 800$  K<sup>2</sup>) when the crystal enters the flask ( $t=0$ ), which implies the surface is not oxidized in air during the transfer. The deviation of less than 6 K also indicates the high reproducibility of the temperature in separate measurements. Figure S1b shows the voltammograms of Pt(111)- $O_{GAS}$  for different cooling times and corresponding temperatures (the temperature at the moment of contacting  $O_2$  can be estimated from Figure S1a; estimated temperatures are given in Figure caption). Compared with the standard voltammogram of Pt(111) (dashed line), the voltammograms of Pt(111)- $O_{GAS}$  show the characteristic peak at 0.12 V with a higher peak current density compared to the situation in which the crystal is cooled down to the room temperature prior to contact with  $O_2$ , which indicates that {111}-type defects have been introduced. With the cooling time decreasing from 10 min to 0 s (and temperature increasing from 0 to 1026 K), more defects are introduced and the stripping potential of atomic oxygen shifts negatively. Thus, the Pt- $O_{GAS}$  generated with a 10 min cooling time is used for further discussion in the main manuscript in order to correlate the Pt(hkl)- $O_{GAS}$  with Pt(hkl) electrochemistry.

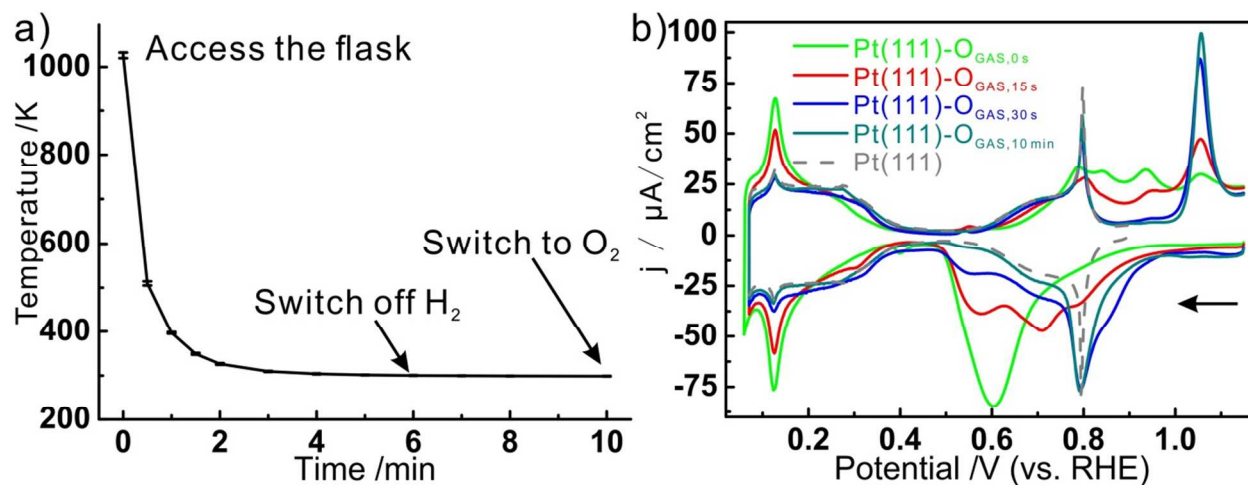

Figure S1 a) Time-dependent temperature of the bead-type Pt(111) crystal in the round-bottom flask; b) Voltammograms of Pt(111)-O<sub>GAS</sub> in 0.1 mol/L HClO<sub>4</sub> electrolyte for different cooling times (0 s: ~1000 K; 15 s: ~500 K; 30 s; ~400 K; 10 min; 300 K). (Scan rate: 50 mV/s).

### **pH dependent stripping voltammogram of Pt(111)-O<sub>GAS</sub> in H<sub>2</sub>SO<sub>4</sub> and surface coverage of O<sub>GAS</sub>**

Figure S2a shows the cyclic voltammograms of Pt(111)-O<sub>GAS</sub> in 0.1 mol/L HClO<sub>4</sub> and 0.1 mol/L H<sub>2</sub>SO<sub>4</sub>, and Figure S2b shows the pH dependent voltammograms of the Pt(111)-O<sub>GAS</sub> in H<sub>2</sub>SO<sub>4</sub> showing a pH independent cathodic peak at 0.8V on the reversible hydrogen electrode (RHE) scale, which indicates a concerted proton-coupled electron transfer reduction of Pt(111)-O<sub>GAS</sub>. The peak between 0.6 and 0.4 V is due to the adsorption of bisulfate HSO<sub>4</sub><sup>-</sup>.<sup>3</sup> Since the structure of HSO<sub>4</sub><sup>-</sup> has been observed to be a  $\sqrt{3} \times \sqrt{7}$  overlayer by STM,<sup>4</sup> corresponding to a coverage of 0.218 ML, the integrated charge of this peak is helpful for estimating the coverage of the atomic oxygen O<sub>GAS</sub> and the nature of the stripping peak. The integrated charges of the Area 1 and Area 2 in figure S2a and Area 3 in figure S2b are 91.2, 140.4 and 45.6  $\mu\text{C}/\text{cm}^2$ , respectively. Here, we use the charge of the HSO<sub>4</sub><sup>-</sup> desorption in pH 2.24 since the peak is deconvoluted from that of adsorbed H. These numbers show that the total charge of reduction of Pt(111)-O<sub>GAS</sub> in H<sub>2</sub>SO<sub>4</sub> (Area 2) and the subsequent desorption of HSO<sub>4</sub><sup>-</sup> (Area 3) is approximately equal to the stripping of Pt(111)-O<sub>GAS</sub> in HClO<sub>4</sub> (Area 1). The voltammograms of Pt(111)-O<sub>GAS</sub> overlap in both electrolytes between 1.15 V and 0.98 V, which suggests that the interaction between Pt(111)-O<sub>GAS</sub> and HSO<sub>4</sub><sup>-</sup> is weak. Therefore, in perchloric acid we propose the following stripping reaction of Pt(111)-O<sub>GAS</sub>:

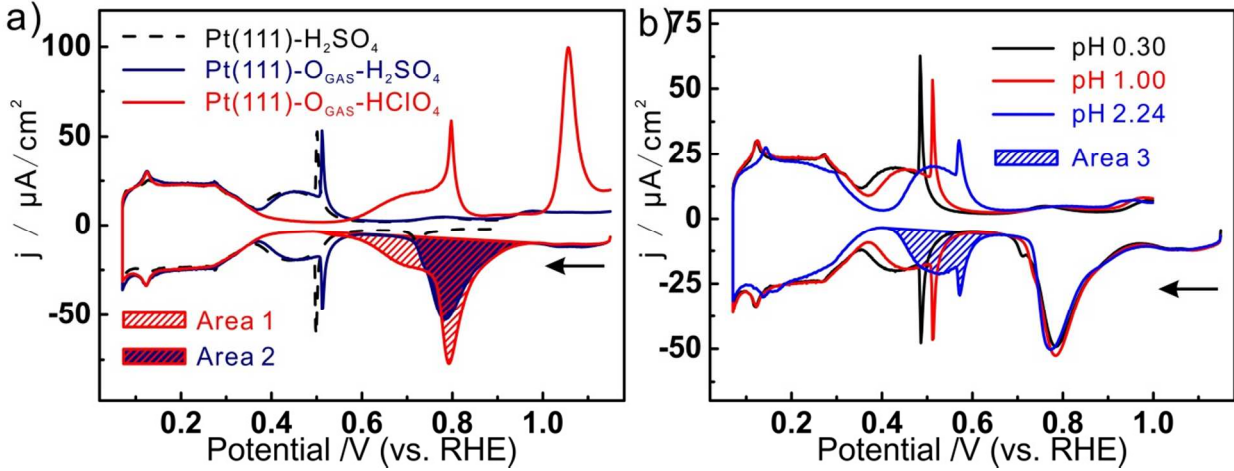

Figure S2 a) Voltammograms of Pt(111)-O<sub>GAS</sub> and Pt(111) in 0.1 mol/L HClO<sub>4</sub> and H<sub>2</sub>SO<sub>4</sub>; the voltammetry of the Pt(111)-O<sub>GAS</sub> starts at 1.15 V; b) pH dependent voltammograms of Pt(111)-O<sub>GAS</sub> (0.1 mol/L H<sub>2</sub>SO<sub>4</sub> + 0.4 mol/L HClO<sub>4</sub>, pH 0.30; 0.1 mol/L H<sub>2</sub>SO<sub>4</sub>, pH 1.00; 0.01 mol/L H<sub>2</sub>SO<sub>4</sub> + 0.09 mol/L Na<sub>2</sub>SO<sub>4</sub>, pH 2.24). (Scan rate: 50 mV/s).

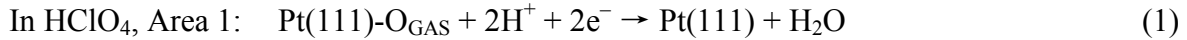

In sulfuric acid, we propose a replacement by HSO<sub>4</sub><sup>-</sup> in the stripping of O on Pt(111)-O<sub>GAS</sub>:

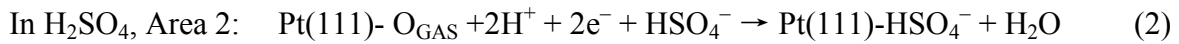

followed by:

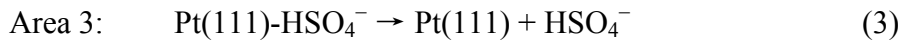

Based on the charge of Area 2 and Area 3 and the coverage of HSO<sub>4</sub><sup>-</sup>, the coverage of oxygen on Pt(111)-O<sub>GAS</sub> is calculated to be 0.336, according to Equation 4 (where  $Q$  is the reaction charge,  $n$  is the number of transferred electrons, and  $\theta$  is the coverage of adsorbate) This

coverage is reasonably consistent with the measurement of 0.4 ML on Pt(111) oxidized in 0.5 Torr O<sub>2</sub>.<sup>5</sup>

$$\theta_O = \frac{Q_O}{Q_{\text{HSO}_4^-}} \times \theta_{\text{HSO}_4^-} \times \frac{n_{\text{HSO}_4^- \text{ desorption}}}{n_{\text{O-stripping}}} = \frac{140.4 \mu\text{C}/\text{cm}^2}{45.6 \mu\text{C}/\text{cm}^2} \times \frac{1}{\sqrt{3} \times \sqrt{7}} \times \frac{1}{2} = 0.336 \quad (4)$$

### Stripping voltammogram of Pt(533)-O<sub>GAS</sub>

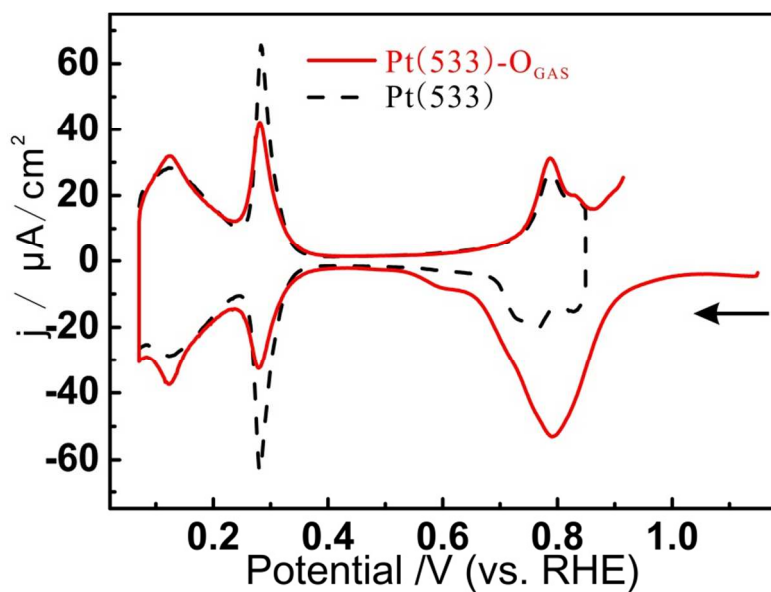

Figure S3 Stripping voltammograms of Pt(533)-O<sub>GAS</sub> and Pt(533). All the measurements were performed in 0.1 M HClO<sub>4</sub> with a scan rate of 50 mV/s.

### REFERENCES

- (1) Bashlakov, D. L.; Juurlink, L. B. F.; Koper, M. T. M.; Yanson, A. I. Subsurface Oxygen on Pt(111) and Its Reactivity for CO Oxidation. *Catal. Lett.* **2011**, *142*, 1-6.

- (2) Steininger, H.; Lehwald, S.; Ibach, H. Adsorption of Oxygen on Pt(111). *Surf. Sci.* **1982**, *123*, 1-17.
- (3) Lachenwitzer, A.; Li, N.; Lipkowski, J. Determination of the Acid Dissociation Constant for Bisulfate Adsorbed at the Pt(111) Electrode by Subtractively Normalized Interfacial Fourier Transform Infrared Spectroscopy. *J. Electroanal. Chem.* **2002**, *532*, 85-98.
- (4) Funtikov, A. M.; Linke, U.; Stimming, U.; Vogel, R. An in-situ STM Study of Anion Adsorption on Pt(111) from Sulfuric Acid Solutions. *Surf. Sci.* **1995**, *324*, L343-L348.
- (5) Miller, D. J.; Öberg, H.; Kaya, S.; Sanchez Casalongue, H.; Friebe, D.; Anniyev, T.; Ogasawara, H.; Bluhm, H.; Pettersson, L. G. M.; Nilsson, A. Oxidation of Pt(111) under Near-Ambient Conditions. *Phys. Rev. Lett.* **2011**, *107*, 195502.
